# Supplementary material for: IL-1R8 Downregulation and Concomitant TLR7 and TLR9 Up-Regulation Are Related to the Pathogenesis of Canine Diffuse Large B-Cell Lymphoma
Source: Preprints.org preprint supplement (doi:10.20944/preprints202204.0090.v1), 2022-04-11
Supplement: Supplementary file 1 [file supplementary]

## Sheet: Foglio1
Table S2. Signalement and clinico-pathological variables of 50 dogs with DLBCL included in the study.
Sample ID#	Breed	Age (years)	Sex	Weight (kg)	Stage	Substage	BM infiltration	PB infiltration	Serum LDH	Pretreatment with steroids	Treatment	TTP	LSS
1	mixed	11	m	23.3	V	a	1.2	1.4	normal	no	CH-IM	31	296
2	mixed	6	m	24	V	b	47.4	1.9	increased	yes	CH-IM	69	71
3	mixed	10	m	6.9	III	a	0.9	0.9	normal	yes	CH-IM	202	388
4	mixed	6	m	37.6	V	a	3.5	1	normal	no	CH-IM	588	767
5	german shepherd	9	f	27	V	b	2.8	1.2	normal	no	CH-IM	171	188
6	german shepherd	9	f	33.1	V	a	50	10	increased	no	CH	34	41
7	cocker	10	f	12.1	IV	a	0.9	0.9	increased	no	CH-IM	180	330
8	boxer	6	m	31.4	V	a	8.3	8.5	increased	no	CH-IM	227	544
9	poodle	14	f	11.2	IV	b	0.2	0.2	normal	no	CH	1	45
10	yorkshire	15	f	4.5	IV	a	0.9	0.9	increased	no	CH-IM	273	302
11	poodle	5	m	23	IV	a	1.3	3.4	increased	no	CH-IM	493	585
12	rottweiler	5	m	42.4	V	a	4.7	1.5	increased	no	CH	1	22
13	border collie	7	f	21	IV	a	1.3	3.7	normal	no	CH-IM	228	356
14	english setter	15	m	22	IV	b	0.9	0.9	normal	yes	CH	113	176
15	jack russel	6	m	6.1	V	b	0.9	0.9	normal	yes	CH	1	23
16	amstaff	11	m	40.9	IV	a	0.9	0.9	normal	no	CH-IM	41	40
17	mixed	12	f	9.3	V	a	0.9	1.4	normal	no	CH	63	82
18	german shepherd	5	f	32.1	IV	a	0.9	0.9	normal	no	CH	1989	1991
19	mixed	12	m	9.1	IV	a	0.9	0.9	increased	yes	CH-IM	35	63
20	german shepherd	10	m	50	IV	a	0.9	0.9	normal	no	CH	24	28
21	boxer	10	f	31.2	V	a	1.4	0.1	normal	no	CH	35	150
22	bernese mountain	3	m	36.1	V	b	22	15	increased	no	CH	20	35
23	rottweiler	6	f	42.3	V	a	2.3	3.1	normal	no	CH	24	160
24	golden retriever	8	f	30.8	V	b	1.2	3.9	increased	yes	CH	179	228
25	golden retriever	7	m	32.8	V	b	8.3	0.9	increased	yes	CH-IM	60	63
26	mixed	10	f	19.1	IV	a	0.9	0.9	increased	yes	CH-IM	36	50
27	french bulldog	4	f	10.6	V	a	1.3	2.2	increased	no	CH-IM	196	237
28	amstaff	7	m	33.9	IV	b	0.9	0.9	increased	no	CH-IM	37	267
29	german shepherd	10	f	38.8	V	a	1.5	0.9	increased	no	CH	26	90
30	bernese mountain	5	f	44	V	a	7.9	2	increased	no	CH-IM	376	603
31	german shepherd	4	m	39.9	V	a	2.3	11.4	normal	yes	CH-IM	203	665
32	mixed	13	f	16.4	IV	b	0.9	0.9	increased	no	CH-IM	1	5
33	rottweiler	7	m	47.8	V	b	5	3	increased	no	CH-IM	202	280
34	dobermann	9	f	37.6	IV	a	0.9	0.9	normal	no	CH-IM	60	94
35	bloodhound	4	m	46.1	V	b	5.5	14.4	normal	no	CH	32	60
36	fox terrier	10	m	10.4	V	a	2.7	3.1	normal	yes	CH-IM	300	301
37	golden retriever	10	m	33.1	V	a	1.4	1.1	normal	no	CH-IM	988	1153
38	basset hound	10	f	24.9	III	a	0.5	0.6	increased	no	CH	78	87
39	mixed	13	m	6.8	V	a	1.2	1	normal	no	CH	455	989
40	golden retriever	6	f	25	V	a	2.5	0.5	increased	no	CH-IM	95	278
41	german shepherd	11	f	36.7	V	b	3.5	5.3	increased	no	CH-IM	76	77
42	rottweiler	3	m	45	V	a	18.2	34.3	normal	no	CH-IM	317	544
43	labrador	5	f	38	V	a	1.6	8.2	increased	yes	CH-IM	325	645
44	great dane	3	m	81.3	V	b	45.6	51.9	increased	no	CH	20	30
45	beagle	5	f	19.5	IV	b	0.9	0.9	increased	no	CH-IM	1192	1218
46	mixed	12	m	17.2	V	b	2.5	0.9	normal	no	CH	19	19
47	mixed	9	m	12.8	IV	a	0.9	0.9	normal	yes	CH	672	1099
48	corgi	6	f	21.6	V	a	1.8	0.9	increased	no	CH-IM	1403	1403
49	italian hound	5	m	17.8	V	b	27.5	55.5	increased	yes	CH-IM	250	669
50	weimaraner	5	f	31.9	V	a	7.6	0.9	normal	yes	CH	98	178
BM: bone marrow; PB: peripheral blood; TTP: time to progression; LSS: lymphoma-specific survival
