# Supplementary material for: IL-1R8 Downregulation and Concomitant TLR7 and TLR9 Up-Regulation Are Related to the Pathogenesis of Canine Diffuse Large B-Cell Lymphoma
Source: Preprints.org preprint supplement (doi:10.20944/preprints202204.0090.v1), 2022-04-11
Supplement: Supplementary file 2 [file Table S1.docx]

**Table S1. Primer pair list.**

| ***Gene*** | ***Protein*** | ***Sequence (5’ 🡪 3’)*** | **Gene ID** | ***Amplicon*** |
| --- | --- | --- | --- | --- |
| ***TLR7*** | Toll-like receptor 7 | F:TGGAAATTGCCCTCGTT  R:GTCAATGCATCGAAAGCTGA | 491743 | *99 bp* |
| ***TLR9*** | Toll-like receptor 9 protein | F:GCAATACCCCGAGCCTGATG R:TATGCAGGCGATTCTGGGAC | 403502 | *105 bp* |
| ***C-MYC*** | myc proto-oncogene protein | F:GCGACTCGGAGGAAGAACAA  R:GACCCCGATTCGGACCTTTT | 403924 | *94 bp* |
| ***NFKB2*** | nuclear factor NF-kappa-B p100 subunit | F:GCCCCTGAAGCCAGTTATTTC  R:CCAGGAGACTTGCTGTCATGG | 486858 | *51 bp* |
| ***IL-1R8*** | Interleukine-1 receptor 8 | F:GATGACAAGGACCCCATGCT  R:TTGCATGCGGTGGAGCTAAT | 100686933 | *142 bp* |
| ***CCZ1*** | CCZ1 Homolog, Vacuolar Protein Trafficking And Biogenesis Associated | F:TGAAGGCACTGCATTTAATTGTTTAT R:CTTCGGCAAAAATCCAATGT | 479750 | *76 bp* |
