# Supplementary material for: IL-1R8 Downregulation and Concomitant TLR7 and TLR9 Up-Regulation Are Related to the Pathogenesis of Canine Diffuse Large B-Cell Lymphoma
Source: Preprints.org preprint supplement (doi:10.20944/preprints202204.0090.v1), 2022-04-11
Supplement: Supplementary file 4 [file Table S3.xlsx]

## Sheet: Foglio1
Table S3a. Median TTP and survival analysis of 50 cDLBCL.								Table S3b. Median LSS and survival analysis of 50 cDLBCL.
		Median TTP (days)	p-value			Hazard ratio (95% CI)				Median LSS (days)	p-value			Hazard ratio (95% CI)
			Log-rank test	Cox univariate	Cox multivariate						Log-rank test	Cox univariate	Cox multivariate
Breed	Pure	179	p=0.7	p=0.7		0.872 (0.426-1.783)		Breed	Pure	327	p=0.8	p=0.8		0.921 (0.45-1.887)
	Mixed	69				ref			Mixed	296				ref
Age	<10 years	202	p=0.3	p=0.3		0.708 (0.386-1.298)		Age	<10 years	356	p=0.1	p=0.1	p=0.09	0.614 (0.334-1.128)
	≥10 years	78				ref			≥10 years	150				ref
Sex	Male	202	p=0.8	p=0.8		1.086 (0.594-1.987)		Sex	Male	388	p=0.9	p=0.9		0.95 (0.52-1.74)
	Female	98				ref			Female	183				ref
Weight	<28.9 Kg	180	p=0.6	p=0.6		0.845 (0.467-1.529)		Weight	<28.9 Kg	296	p=0.7	p=0.7		0.874 (0.483-1.584)
	≥28.9 Kg	98				ref			≥28.9 Kg	178				ref
Stage	3	140	p=0.8	p=0.8		ref		Stage	3	238	p=0.9	p=0.9		ref
	4	113				0.648 (0.143-2.932)			4	267				0.698 (0.155-3.133)
	5	171				0.781 (0.183-3.325)			5	228				0.757 (0.178-3.219)
Substage	a	202				ref		Substage	a	302				ref
	b	69	p=0.06	p=0.06	p=0.08	1.862 (0.984-3.524)			b	77	p=0.05	p=0.06	p=0.08	1.853 (0.983-3.492)
Bone marrow	Infiltrated	98	p=0.3	p=0.3		1.377 (0.719-2.636)		Bone marrow	Infiltrated	77	p=0.2	p=0.2		1.518 (0.790-2.917)
	Not infiltrated	171				ref			Not infiltrated	267				ref
Bone marrow infiltration (%)				p=0.06	p=0.13	1.025 (0.999-1.051)		Bone marrow infiltration (%)				p=0.04	p=0.03	1.03 (1.002-1.058)
Blood infiltration (%)				p=0.6		1.007 (0.982-1.032)		Blood infiltration (%)				p=0.8		1.002 (0.979-1.027)
LDH	Normal	171				ref		LDH	Normal	296				ref
	Increased	95	p=0.6	p=0.6		1.184 (0.652-2.151)			Increased	232	p=0.4	p=0.4		1.283 (0.705-2.335)
Pre-treatment with steroids	yes	146	p=0.7	p=0.7		1.121 (0.578-2.171)		Pre-treatment with steroids	yes	203	p=0.8	p=0.8		1.107 (0.574-2.136)
	no	171				ref			no	267				ref
Treatment	CH-IM	203	p=0.03	p=0.03	p=0.02	0.517 (0.281-0.952)		Treatment	CH-IM	356	p=0.05	p=0.05	p=0.1	0.543 (0.293-1.005)
	CH	34				ref			CH	87				ref
TLR7				p=0.8		1.042 (0.791-1.372)		TLR7				p=0.8		1.03 (0.777-1.366)
MYC				p=0.9		0.996 (0.938-1.058)		MYC				p=0.8		0.991 (0.934-1.053)
TLR9				p=1		1.019 (0.169-6.15)		TLR9				p=0.9		1.153 (0.184-7.236)
IL-1R8				p=0.7		2.23 (0.025-199.7)		IL-1R8				p=0.5		4.691 (0.037-591.8)
p52				p=0.4		1.193 (0.786-1.811)		p52				p=0.2		1.298 (0.847-1.991)
