# Supplementary material for: IL-1R8 Downregulation and Concomitant TLR7 and TLR9 Up-Regulation Are Related to the Pathogenesis of Canine Diffuse Large B-Cell Lymphoma
Source: Preprints.org preprint supplement (doi:10.20944/preprints202204.0090.v1), 2022-04-11
Supplement: Supplementary file 5 [file Table S4.docx]

**Table S4. *IL-1R8, p52, TLR7, TLR9* and *MYC* expression in cDLBCLs and control lymph nodes. Data are expressed as relative quantification values (arbitrary units, mean ± SD).**

|  | Mean ± SD | |  |  |
| --- | --- | --- | --- | --- |
|  | **DLBCLs** | **Control LNs** | **Fold change** | **p-value** |
| ***IL-1R8*** | 0.06 ± 0.07 | 0.48 ± 0.68 | -7.47 | p=1.123E-05 |
| ***p52*** | 1.00 ± 0.68 | 2.70 ± 0.83 | -2.69 | p=7.638E-07 |
| ***TLR7*** | 1.78 ± 1.09 | 0.93 ± 0.47 | 1.92 | p=0.004485 |
| ***MYC*** | 11.61 ± 4.62 | 5.15 ± 1.13 | 2.26 | p=5.772E-06 |
| ***TLR9*** | 0.32 ± 0.17 | 0.15 ± 0.07 | 2.16 | p=0.0002687 |
